# Supplementary material
Source: publisher figshare collection journal article supplement (https://aacr.figshare.com/articles/dataset/_/22820353)

# Supplementary Figure 8

## A

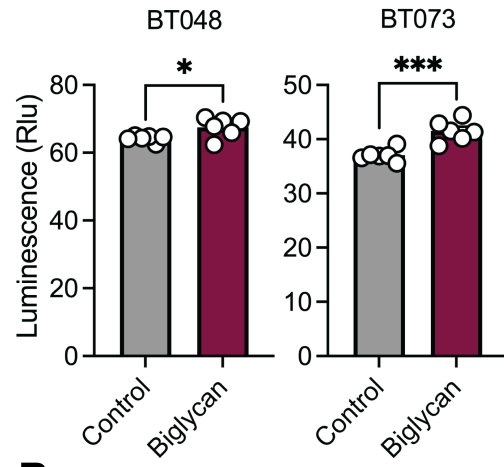

## C

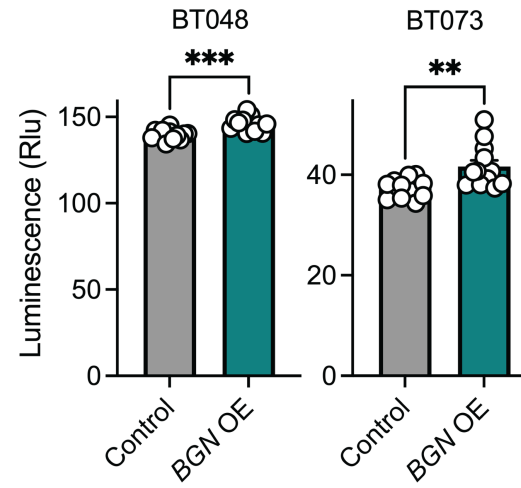

## B

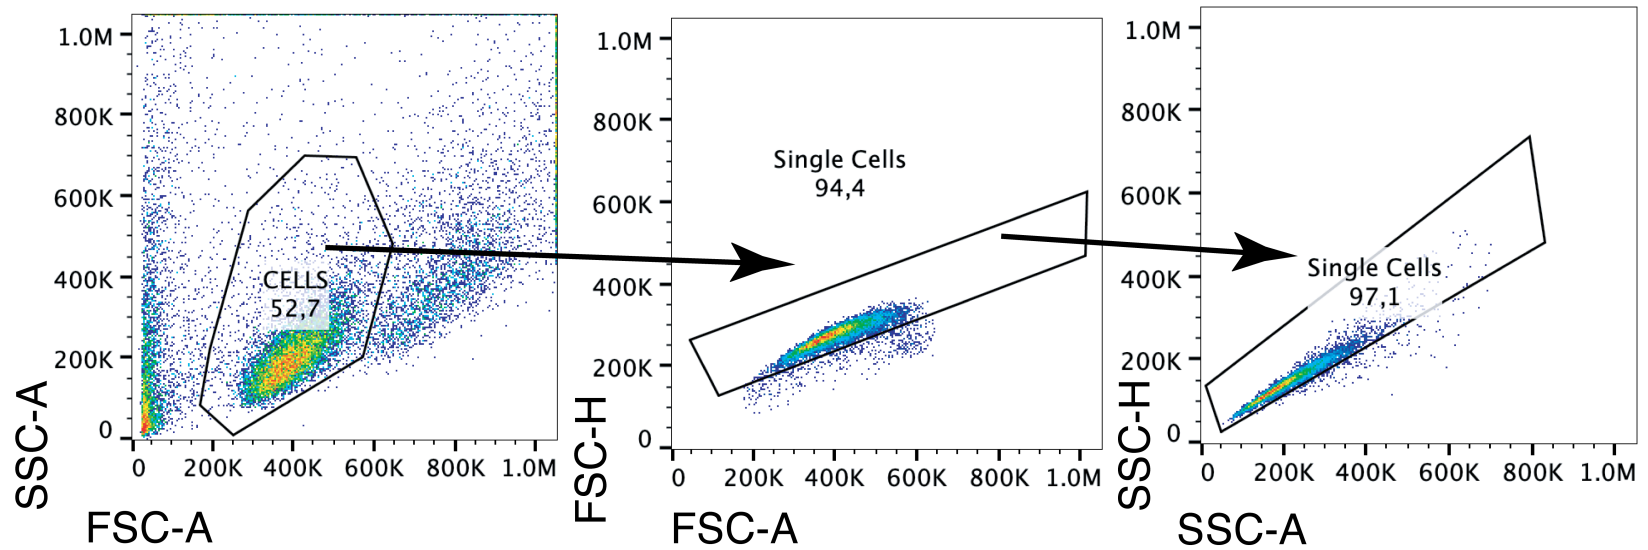

Supplement: Supplementary file 1 [file 40570624]
